# Supplementary material for: Effect of physical training on airway inflammation in bronchial asthma: a systematic review
Source: BMC Pulm Med. 2013 Jun 13;13:38. doi: 10.1186/1471-2466-13-38 (PMC3751945; doi:10.1186/1471-2466-13-38)
Supplement: Additional file 1 — Summary of included studies. This file provides details of the studies included in this systematic review including the number of subjects, mode of asthma diagnosis, asthma severity and control, current asthma pharmacotherapy, study design, training intervention (dose, duration, site, intensity and frequency of physical exercise), control intervention and outcome measures. [file 1471-2466-13-38-S1.pdf]

### Additional File 1. Summary of included studies

| Reference                 | No of subjects                          | Mean Age; Female % | Asthma Diagnosis, Asthma Severity, Medications,                                                                            | Intervention                                                                                                                                   | Study Design (control group)                                                                  | Outcome Measures                                                                                                                                                                                                                                                                                                                                   |
|---------------------------|-----------------------------------------|--------------------|----------------------------------------------------------------------------------------------------------------------------|------------------------------------------------------------------------------------------------------------------------------------------------|-----------------------------------------------------------------------------------------------|----------------------------------------------------------------------------------------------------------------------------------------------------------------------------------------------------------------------------------------------------------------------------------------------------------------------------------------------------|
| Bonsignore MR et al. 2008 | 24                                      | 10 y; 20%          | Positive MCT and skin test, Mild, controlled asthma; All patients on as needed SABA only                                   | Aerobic circuit training 60 min, 2-4 times/week for 12 weeks at a moderate to vigorous intensity which gradually increased during the program. | RCT (Subjects randomized to placebo or LTRA, all exercised; we included the placebo arm only) | -EIB - defined as decrease by 10% of baseline FEV <sub>1</sub> at 10 or 20 minutes after maximal treadmill test – increased the slope by 2% until attainment of max Heart Rate or exhaustion, speed selected by subject)<br>-eNO (ppb)<br>-exhaled breath condensates of cysteinyl leukotrienes (po and nasal) (pg/mL)<br>-MCT (PC <sub>20</sub> ) |
| Boyd, A. et al. 2011      | 9<br>(3 trained, 6 control) in progress | 19-70y; ¥          | Per ATS guidelines, evidence of reversibility via spirometry. Mild to moderate persistent asthma; Medications not reported | Walking program 3 times/week over 12 weeks at 60-75% of age-predicted maximum heart rate                                                       | RCT                                                                                           | Interleukin-1 $\beta$<br>Pro-inflammatory targets in peripheral blood and nasal lavage                                                                                                                                                                                                                                                             |
| Bundgaard A, et al. 1982  | 27<br>(16 exercise, 11 control)         | 37 y; ¥            | Decreased PEF >20% after running 6 min, and decreased FEV1 >20% after 500 mcg of                                           | 15 min warm-up, heavy exercise: intervals and a circuit program for 45 min 2 times/week, for 8                                                 | RCT (control group: light exercise for                                                        | -change in PEFR pre and post-(1,3,5,10,15 min) 6 min run test (change = highest value pre- or post-                                                                                                                                                                                                                                                |

|                               |                         |              |                                                                                                                                                                                                                                                                                                                                        |                                                                                                                                                                    |                                                                                                                                     |                                                                                                                                                                                |
|-------------------------------|-------------------------|--------------|----------------------------------------------------------------------------------------------------------------------------------------------------------------------------------------------------------------------------------------------------------------------------------------------------------------------------------------|--------------------------------------------------------------------------------------------------------------------------------------------------------------------|-------------------------------------------------------------------------------------------------------------------------------------|--------------------------------------------------------------------------------------------------------------------------------------------------------------------------------|
|                               |                         |              | histamine,<br>Moderate to severe<br>asthma; 22% on ICS;<br>50% on oral steroids                                                                                                                                                                                                                                                        | weeks                                                                                                                                                              | 60 min, 2<br>times/week<br>x 8 weeks<br>calisthenics,<br>stretching,<br>short run,<br>power<br>exercises<br>heart rate<<br>120 bpm) | lowest post value) in mean<br>+/- SEM L/min                                                                                                                                    |
| Cochrane<br>LM et al.<br>1990 | 36<br>(18 per<br>group) | 28 y;<br>61% | “Chronic mild to<br>moderate asthma as<br>defined by a need for<br>regular prophylactic<br>treatment and<br>reproducible airway<br>obstruction upon<br>treatment withdrawal” ,<br>PC <sub>20</sub> histamine all < 8<br>mg/mL,<br>Mild to moderate ,<br>controlled asthma;<br>58% on ICS; 5% on<br>prednisone; 39% on<br>cromoglycates | Warm-up, then 30 min<br>varied aerobic exercises<br>including cycling,<br>jogging, aerobics, then a<br>cool-down at 75% max.<br>HR 30 min 3x/week for<br>12 weeks. | RCT<br>(control:<br>attendance<br>at education<br>sessions)                                                                         | -Change in histamine PC <sub>20</sub>                                                                                                                                          |
| Emtner M<br>et al. 1996       | 22***                   | 41y;<br>77%  | PEFR reversibility<br>≥ 20%, Mild to<br>moderate asthma; 38%<br>on low dose ICS alone;<br>58% on medium dose<br>ICS±LABA; 4% on                                                                                                                                                                                                        | Swimming for 45 min, 5<br>times/week plus<br>education 5 days/week<br>for 2 weeks at 80-90%<br>maximum predicted heart<br>rate and then 2                          | Prospective<br>Cohort                                                                                                               | -MCT (PC <sub>20</sub> )-exercise-<br>induced asthma (defined by<br>a fall in PEFR by > 15%<br>(5, 10, 15, or 30 min after<br>6 min submaximal cycle<br>ergometry test) units: |

|                         |       |              |                                                                                                                                                                                                                                                                |                                                                                                                                                                                                                                                |                                                                                                                                                                                                                      |                                                                                                                                                                                                                                              |
|-------------------------|-------|--------------|----------------------------------------------------------------------------------------------------------------------------------------------------------------------------------------------------------------------------------------------------------------|------------------------------------------------------------------------------------------------------------------------------------------------------------------------------------------------------------------------------------------------|----------------------------------------------------------------------------------------------------------------------------------------------------------------------------------------------------------------------|----------------------------------------------------------------------------------------------------------------------------------------------------------------------------------------------------------------------------------------------|
|                         |       |              | medium dose ICS<br>±LABA and (oral steroid<br>and/or oral $\beta$ 2 agonist<br>and/or theophylline)                                                                                                                                                            | times/week for 8 weeks<br>at Borg dyspnea 7-8 plus<br>education 5 days/week                                                                                                                                                                    |                                                                                                                                                                                                                      | maximal decrease<br>compared to initial value in<br>L/min                                                                                                                                                                                    |
| Emtner M<br>et al. 1998 | 57*** | 38 y;<br>66% | Diagnosis “per ATS<br>criteria”, Mild to<br>moderate, controlled<br>asthma;<br>12% on low dose ICS<br>alone; 41% on medium<br>dose ICS ±LABA;<br>45% on medium dose<br>ICS ±LABA and (oral<br>steroid and/or oral $\beta$ 2<br>agonist and/or<br>theophylline) | Exercise on land, water,<br>or water & land for 30<br>min at frequencies<br>varying (0.2 to 3<br>times/week) for 156<br>weeks at varying<br>intensities (from “light”<br>Borg 4.1 to “heavy” Borg<br>6.6)                                      | Prospective<br>Cohort<br>3 year<br>follow-up<br>study post<br>10 weeks of<br>rehabilitatio<br>n (same<br>subjects as<br>in the two<br>studies<br>below with<br>3 year post-<br>rehabilitatio<br>n follow-up<br>data) | -MCT (PC <sub>20</sub> )<br>EIB – defined as a drop in<br>PEFR by 10% after a<br>submaximal 6 min cycle<br>ergometry test measured 0,<br>5, 10, 15, and 30 minutes<br>post exercise (units:<br>number of subjects meeting<br>these criteria) |
| Emtner et<br>al. 1998   | 31*** | 36y;<br>56%  | Diagnosis “per ATS<br>criteria”, Mild to<br>moderate, controlled<br>asthma;<br>22% on low dose ICS<br>alone; 41% on medium<br>dose ICS ±LABA;<br>37% on medium dose<br>ICS ±LABA and (oral<br>steroid and/or oral $\beta$ 2<br>agonist and/or                  | Land or water training<br>for 45 minutes 5<br>time/week for 2 weeks<br>including 16 minutes of<br>interval training at 80 –<br>100% maximum heart<br>rate, training continued 2<br>times/week for the next 8<br>weeks at Borg dyspnea 7<br>- 8 | RCT                                                                                                                                                                                                                  | -MCT (PC <sub>20</sub> )<br>-Exercise-induced asthma<br>(% having a fall in PEFR<br>≥10% after submaximal 6<br>min cycle ergometry<br>measured 10 and 30 min<br>after exercise). PEFR in<br>L/min given in raw data<br>form as well.         |

|                        |                                    |              |                                                                                                                         |                                                                                                                                                                                                                                                                                                                                                                                                                               |                                 |                                                                                                                                                                                                                                                                                                     |
|------------------------|------------------------------------|--------------|-------------------------------------------------------------------------------------------------------------------------|-------------------------------------------------------------------------------------------------------------------------------------------------------------------------------------------------------------------------------------------------------------------------------------------------------------------------------------------------------------------------------------------------------------------------------|---------------------------------|-----------------------------------------------------------------------------------------------------------------------------------------------------------------------------------------------------------------------------------------------------------------------------------------------------|
|                        |                                    |              | theophylline)                                                                                                           |                                                                                                                                                                                                                                                                                                                                                                                                                               |                                 |                                                                                                                                                                                                                                                                                                     |
| Engstom I, et al. 1991 | 6                                  | 11 y;<br>0%  | No formal diagnostic criteria indicated but subjects from an Asthma-Allergy unit. Moderate to severe asthma; All on ICS | Swimming or gymnastics (goal HR 160-180) x 30 min (also a 15 min warm-up) 2 times/week, for 32 weeks. Accompanied by 15 min of relaxation & teaching at the end of every session                                                                                                                                                                                                                                              | Prospective Cohort              | -Bronchial reactivity to histamine (reaction dose mg/mL)                                                                                                                                                                                                                                            |
| Fanelli A, et al. 2007 | 38<br>(21 exercise,<br>17 control) | 11 y;<br>39% | Asthma per GINA guidelines, Moderate to severe persistent, controlled asthma; All on moderate dose ICS                  | 15 min warm-up, 15 min cool-down, 60 min of exercise (30 min aerobics, 30 min endurance exercises), 2 times/week for 16 weeks. Training intensity gradually increased over first 8 sessions, and heart rate goal (anaerobic threshold – respiratory compensation point) in incremental CPET. Intensity then gradually increased by 5% when child able to continuously perform the proposed activity for two consecutive days. | RCT (control: “non-exercising”) | -EIB (treadmill speed increased over < 4 min to reach 80% max HR & maintained x 6 min with spirometry pre- and 5, 10, 20 min post-exercise) with outcome being % decrease in FEV <sub>1</sub> of its pre-exercise value<br>-proportion of subjects with EIB+ (≥10% drop) or EIB+ severe (≥30% drop) |
| Fitch, KD              | 26                                 | 12 y; ¥      | 1962 ATS definition of                                                                                                  | 15 min warm-up                                                                                                                                                                                                                                                                                                                                                                                                                | RCT                             | -Maximum drop in PEFR                                                                                                                                                                                                                                                                               |

|                       |                                                     |              |                                                                                                                                                                                                                                                                                                                                  |                                                                                                                                                                                                                                                                                                                               |                                              |                                                                                                                                    |
|-----------------------|-----------------------------------------------------|--------------|----------------------------------------------------------------------------------------------------------------------------------------------------------------------------------------------------------------------------------------------------------------------------------------------------------------------------------|-------------------------------------------------------------------------------------------------------------------------------------------------------------------------------------------------------------------------------------------------------------------------------------------------------------------------------|----------------------------------------------|------------------------------------------------------------------------------------------------------------------------------------|
| et al, 1986           | (10 in the exercise group, 16 in the control group) |              | asthma diagnosis.<br>Asthma severity unclear;<br>Medications not reported                                                                                                                                                                                                                                                        | consisting of slow jogging and calisthenics, followed by running or games based on running (soccer, net ball, interval sprints, continuous running, volleyball) and circuit training with a target heart rate calculated as follows:<br>0.75 (Maximum heart rate – Resting heart rate) for 45 min, 4 times/week for 12 weeks. | (control: no alteration to normal lifestyle) | pre- and post treadmill exercise (speed and grade requiring 80% of VO <sub>2</sub> max)<br>Outcome measure: % of pre-exercise PEFR |
| Gunay, O. et al. 2012 | 30<br>(unclear how many in each group)              | 9.8y;<br>27% | Diagnosis of asthma based on history of recurrent cough and wheezing with prolonged expiration time which demonstrated clinical reversibility with short acting bronchodilator therapy, beta-2 agonist in subjects attending Paediatric Allergy and Pulmonology Department, Severity of asthma unclear; Medications not reported | Cycling at 80% of submaximal heart rate (submaximal heart rate being 50% higher than resting heart rate) plus 15 min warm-up 2x/week for 8 weeks and “pharmacologic therapy”                                                                                                                                                  | RCT                                          | -Plasma matrix metalloproteinase -9 (MMP9), endothelin-1, MDA<br>-urine leukotriene E4                                             |
| Henriksen             | 42                                                  | 11 y; ¥      | Decrease in PEF 15%                                                                                                                                                                                                                                                                                                              | Warm-up 15 min, 60 min                                                                                                                                                                                                                                                                                                        | RCT                                          | -EIB (PEFR measured                                                                                                                |

|                                |                                    |                |                                                                                                                                                                                                                                                                                   |                                                                                                               |                                                                                |                                                                                                                                                                                                                                                                                                                                                                                                                                           |
|--------------------------------|------------------------------------|----------------|-----------------------------------------------------------------------------------------------------------------------------------------------------------------------------------------------------------------------------------------------------------------------------------|---------------------------------------------------------------------------------------------------------------|--------------------------------------------------------------------------------|-------------------------------------------------------------------------------------------------------------------------------------------------------------------------------------------------------------------------------------------------------------------------------------------------------------------------------------------------------------------------------------------------------------------------------------------|
| JM, et al.<br>1983             | (28<br>exercise,<br>14<br>control) |                | from baseline after<br>submaximal exercise test,<br>Mild to moderate asthma;<br>Training group: 11% on<br>theophylline, 11% on<br>immunotherapy, 4% on<br>prednisone; Control arm:<br>less medications and only<br>reliever therapy                                               | of ball games, running,<br>gymnastics, circuit<br>training & relay races<br>2x/week for 6 weeks               | (control:<br>usual<br>physical<br>activities in<br>school and<br>leisure time) | before exercise, after 2,4,5-<br>6 min of exercise, and<br>3,5,10,15,20 post exercise<br>with exercise being<br>running on a treadmill for<br>5-6 min at 80-85%<br>maximum workload):<br>absolute fall from baseline<br>in PEFR (baseline – lowest<br>post-exercise/expected<br>value x 100 expressed as a<br>%), or % fall from baseline<br>in FEV <sub>1</sub> (baseline – lowest<br>post-exercise /baseline x<br>100 expressed as a %) |
| Juvonen R,<br>et al. 2008      | 171                                | 20 y;<br>0%    | “Physician-diagnosed<br>asthma” based on data<br>from prior examination<br>but not confirmed at the<br>start of the study period.<br>Physicians in Finland<br>adhere to national<br>guidelines when<br>diagnosing asthma. Mild<br>to moderate asthma;<br>Medications not reported | Military service of<br>duration 180, 270, or 362<br>days                                                      | Prospective<br>Cohort                                                          | Serum highly sensitive<br>CRP (change in mg/L)<br>after the training program                                                                                                                                                                                                                                                                                                                                                              |
| Matsumoto<br>I, et al.<br>1997 | 16<br>(8/group)                    | 10 y;<br>12.5% | Diagnosis “per ATS<br>criteria”, Mild to<br>moderate asthma; 50%<br>on ICS, 75% on<br>theophylline, 38% on                                                                                                                                                                        | Swimming for 30 min (2<br>x 15 min intervals) 6<br>times/week for 6 weeks<br>at 125% of lactate<br>threshold. | RCT<br>(control<br>group: not<br>specified)                                    | -Histamine challenge test<br>(PC <sub>20</sub> mcg/mL)<br>-EIB: maximum % fall in<br>FEV <sub>1</sub> after (5 & 15 min)<br>swimming ergometer,                                                                                                                                                                                                                                                                                           |

|                        |                                                                                  |             |                                                                                                                                                                                             |                                                                                                                                                                                                                                                                                                                        |                                                                              |                                                                                                                                                                             |
|------------------------|----------------------------------------------------------------------------------|-------------|---------------------------------------------------------------------------------------------------------------------------------------------------------------------------------------------|------------------------------------------------------------------------------------------------------------------------------------------------------------------------------------------------------------------------------------------------------------------------------------------------------------------------|------------------------------------------------------------------------------|-----------------------------------------------------------------------------------------------------------------------------------------------------------------------------|
|                        |                                                                                  |             | cromoglycates                                                                                                                                                                               |                                                                                                                                                                                                                                                                                                                        |                                                                              | cycle ergometer at 100% and 175% lactate threshold (absolute and relative loads)                                                                                            |
| Mendes F. et al. 2011  | 51<br>(24 control, 27 trained)                                                   | 37 y, 82%   | Asthma diagnosis based on GINA guidelines. Moderate to severe persistent asthma; 100% on moderate to high dose budesonide, 94% on LABAs                                                     | Indoor treadmill for 30 min twice a week x 12 weeks initiated at 60% VO <sub>2</sub> max x 2 weeks, then increased to 70% or 80% VO <sub>2</sub> max. If two consecutive asymptomatic sessions, increased HR by 5% up to a max of 80% max HR. Also underwent the same education & breathing exercises as control group | RCT (control: education and breathing exercises 30 min 2x/week for 12 weeks) | -Induced sputum: total cell count (x10 <sup>6</sup> ), eosinophils, PMNs, macrophages (%)<br>-FeNO (ppb)                                                                    |
| Moreira, A et al. 2008 | 32<br>(16 per group but measurements done on 14 – 16 depending on which outcome) | 13 y; 59%   | Method of asthma diagnosis unknown but “atopic” and “asthmatic” and followed in a University clinic. Mild, controlled asthma; All on low to moderate dose ICS<br>65% on LABA<br>26% on LTRA | Mixed submaximal training (aerobic, strength, balance) for 30-35 min with a total of 17-20 min of warm-up/cool-down 2 times/week for 12 weeks                                                                                                                                                                          | RCT (control: continued their usual routine)                                 | -eNO (ppb)<br>-serum: eosinophils (%), highly sensitive CRP (mg/dL), total IgE (kUA/L), mite-specific IgE (kUA/L), ECP (mcg/L)<br>- MCT (PD <sub>20</sub> , measured in mg) |
| Neder JA, et al. 1999  | 42<br>(26 in exercise,                                                           | 12.4 y; 43% | Method of diagnosis unclear but referred from                                                                                                                                               | 10-15 min warm-up of calisthenics, stretching,                                                                                                                                                                                                                                                                         | RCT (control                                                                 | -EIB: spirometry measured 5, 10, 20 min post-exercise                                                                                                                       |

|                           |                                                                                      |               |                                                                                                                               |                                                                                                                                                                            |                            |                                                                                                                                                                                                                                                                         |
|---------------------------|--------------------------------------------------------------------------------------|---------------|-------------------------------------------------------------------------------------------------------------------------------|----------------------------------------------------------------------------------------------------------------------------------------------------------------------------|----------------------------|-------------------------------------------------------------------------------------------------------------------------------------------------------------------------------------------------------------------------------------------------------------------------|
|                           | 16 control)<br>BUT EIB testing done in only those with normal baseline FEV1 (n = 35) |               | an asthma management centre,<br>Moderate to severe asthma; All on ICS, 21% on prednisone                                      | then 30 min cycling with target heart rate set to anaerobic threshold and increased q 2 weeks to an intensity the subject could endure for 30 min, 3 time/week for 8 weeks | group: “untrained”)        | (cycle ergometer with workload increased at 1 min to 80% predicted HR and then maintained for 6 minutes)<br>(outcome: % of participants considered to have EIB – present if FEV <sub>1</sub> decreased by ≥10% of pre-exercise value)                                   |
| Newcomb, P. et al. 2012   | 24                                                                                   | 5-12 y; 62.5% | Physician diagnosed asthma from primary care clinics, ER, short-stay hospital, Mild asthma; Medications not reported          | Walking program at a brisk pace for 30 min 5x/week for 2 weeks                                                                                                             | Cohort                     | -FeNO                                                                                                                                                                                                                                                                   |
| Nickerson BG et al., 1983 | 15                                                                                   | 11 y; 20%     | ATS criteria of asthma diagnosis, Severe asthma; All on ICS and theophylline, 13% on prednisone; 60% on oral sympathomimetics | Running (based on distance of 3.2 km so not timed, but subjects encouraged to compete with each other & with their previous times), 4 times/week for 6 weeks               | Prospective Cohort         | -EIB 5 and 10 min post-exercise (measured by change in airway resistance, fall in FEV <sub>1</sub> , or fall in FEF 25-75% after a graded maximal exercise stress test on a bicycle)<br>(outcome was % baseline for all three parameters pre and post training program) |
| Onur E, et al. 2011       | 30 (15/group)                                                                        | 10 y; 27%     | Clinical history and clinical reversibility with short-acting B2 agonist, Mild asthma;                                        | Cycling for 45 min at 80% of submaximal heart rate (submaximal HR being 50% higher than                                                                                    | RCT Control group received | -Plasma malondialdehyde (MDA), glutathione peroxidase (GSH-PX), superoxide dismutase                                                                                                                                                                                    |

|                       |                                                                        |                              |                                                                                                                                                                                                                                                               |                                                                                                                                                                                                                                                           |                                                             |                                                                                                                                                                                                                                                            |
|-----------------------|------------------------------------------------------------------------|------------------------------|---------------------------------------------------------------------------------------------------------------------------------------------------------------------------------------------------------------------------------------------------------------|-----------------------------------------------------------------------------------------------------------------------------------------------------------------------------------------------------------------------------------------------------------|-------------------------------------------------------------|------------------------------------------------------------------------------------------------------------------------------------------------------------------------------------------------------------------------------------------------------------|
|                       |                                                                        |                              | None on ICS                                                                                                                                                                                                                                                   | resting HR) plus 15 min warm-up 2x/week for 8 weeks plus fluticasone 250 mcg/day                                                                                                                                                                          | only fluticasone in the same dose as the intervention group | (SOD), total nitric oxide (NO)                                                                                                                                                                                                                             |
| Silva PL, et al. 2011 | 26                                                                     | 16 y; 75%                    | ATS guidelines<br>Clinical asthma & reversibility post-bronchodilator.<br>Mild to moderate asthma;<br>Medications not reported                                                                                                                                | Aerobic training 30 min and resistance training 30 min 3 times/week x 52 weeks<br>(running on treadmill at cardiac frequency of ventilator threshold)<br>-also got psychological & nutritional therapy 1x/wk                                              | Prospective Cohort                                          | -Serum CRP (ng/mL), leptin (ng/mL), adiponectin (ng/mL), Il-6 described in the abstract presented at the 11 <sup>th</sup> International Congress on Obesity in 2010, but not in the results section of the published article in 2011<br>-serum eosinophils |
| Sly RM, et al. 1972   | 26<br>(13 in each group) but only 11 asthmatics completed the EIB test | 9-13 y; <sup>¥</sup>         | All had recurrent episodes of airway obstruction remitting spontaneously or following bronchodilator treatment, a history of perennial asthma symptoms, and were attending a pediatric allergy clinic. Moderate to severe asthma;<br>Medications not reported | Swimming, calisthenics, tumbling, work-out on bars, rope climbing, running, relay races 120min, 3 times/week for 12 weeks and a schedule of exercises to be done at home (relaxation, breathing, strengthening). Also participated in breathing exercises | RCT<br>(control: not specified)                             | -PEFR immediately pre and 10 min post treadmill exercise (8 minutes, 10° grade, 3 miles/hour)<br>Outcome: mean decrease in PEFR following exercise before and after the program                                                                            |
| Svenonius E, et al.   | 50<br>(40 in the exercise                                              | "Children" age not reported; | History of asthma on exertion and allergen-                                                                                                                                                                                                                   | Interval training, running, swimming with a goal                                                                                                                                                                                                          | RCT<br>(control                                             | - FEV <sub>1</sub> pre- and post (4 min +/- 1 min) - treadmill test                                                                                                                                                                                        |

|      |                                          |   |                                                                                                                                                                              |                                                                                                                                                                                                                         |                                                |                                                                                                                                                                  |
|------|------------------------------------------|---|------------------------------------------------------------------------------------------------------------------------------------------------------------------------------|-------------------------------------------------------------------------------------------------------------------------------------------------------------------------------------------------------------------------|------------------------------------------------|------------------------------------------------------------------------------------------------------------------------------------------------------------------|
| 1983 | group, 10<br>in the<br>control<br>group) | ¥ | mediated asthma, volume<br>of trapped gas increased<br>by $\geq 24$ mL after<br>treadmill exercise to HR<br>170 bpm. Mild Asthma;<br>None on anti-<br>inflammatory treatment | heart rate of 170 bpm for<br>30 min (preceded by 5<br>min warm-up), 2<br>times/week, for 12 – 16<br>weeks (15 participants in<br>the training group did<br>voluntary activity but<br>commonly did interval<br>training) | group did<br>not change<br>their<br>lifestyle) | (6 min, 5% grade, speed<br>increased to meet a HR of<br>170 bpm)<br>Outcome: mean differences<br>in % of predicted normal<br>values before and after<br>training |
|------|------------------------------------------|---|------------------------------------------------------------------------------------------------------------------------------------------------------------------------------|-------------------------------------------------------------------------------------------------------------------------------------------------------------------------------------------------------------------------|------------------------------------------------|------------------------------------------------------------------------------------------------------------------------------------------------------------------|

¥Sex distribution unclear

SABA – Short Acting Beta-2 Agonist

ICS – Inhaled corticosteroids

LABAs- Long Acting Bronchodilators

LTRA – Long Acting Leukotriene Antagonists

RCT – Randomized Controlled Trial

MCT – Methacholine Challenge Test

EIB – Exercise Induced Bronchoconstriction

PEF/R – Peak Expiratory Flow/Rate

FeNO- Fractional excretion of Nitric Oxide

CPET – Cardio Pulmonary Exercise Test

ATS –American Thoracic Society

GINA- Global Initiative for Asthma
